# Supplementary material
Source: Springer Nature journal article supplement (https://www.springermedizin.de/resource/supplementary/12936_2014_3278_MOESM12_ESM.pdf/9545484)
Supplement: MOESM12 [file 9545484]

*Cost-effectiveness*

**Outline of study set up**

**Design**

**Included costs**

**Included outcomes**

**ICER**

**Discounting**

**Sensitivity analysis**

Chanda 2011

+

+

+

-

+

+

-

Hawkes 2009

+

+

-

-

+

?

-

Lemma 2011

+

?

+

-

+

?

+
